# Supplementary material for: Inferring Sediment Transport Capacity from Soil Microtopography Changes on a Laboratory Hillslope
Source: MDPI journal article supplement (doi:10.3390/w13070929), 2021-03-29

**S1:** Flow accumulation (Flow acc.), elevation change (Delta Z) and slope maps obtained after incremental rainfall/runoff events 1Q, 2Q, 3Q, 4Q and 6Q from the 9.75 m x 3.66 m plots. Q = 0.24 m<sup>3</sup>

Drainage condition, Low flow, Run 1

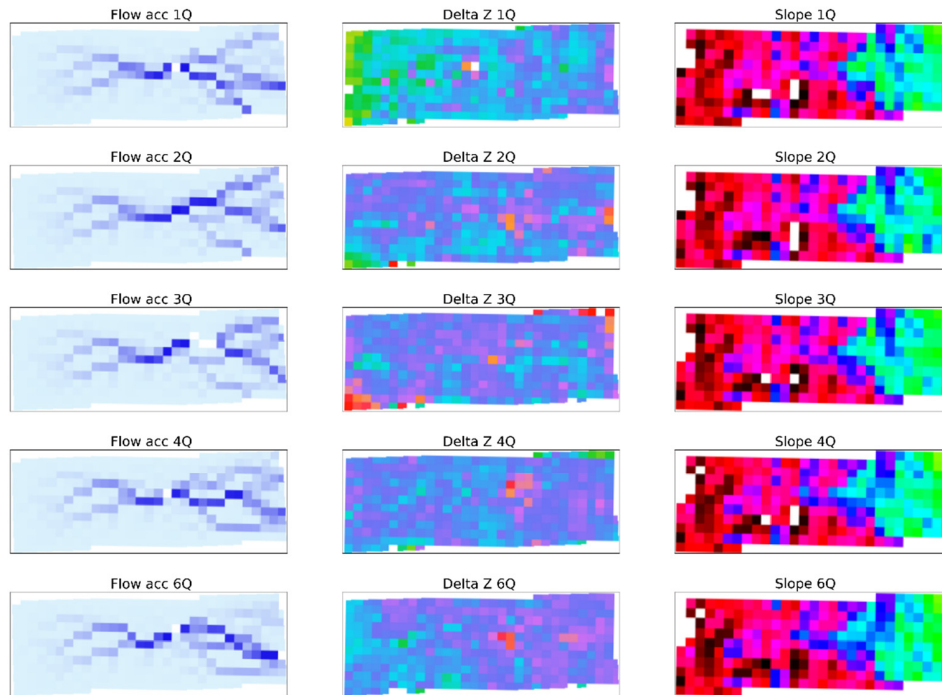

Drainage condition, Low flow, Run 2

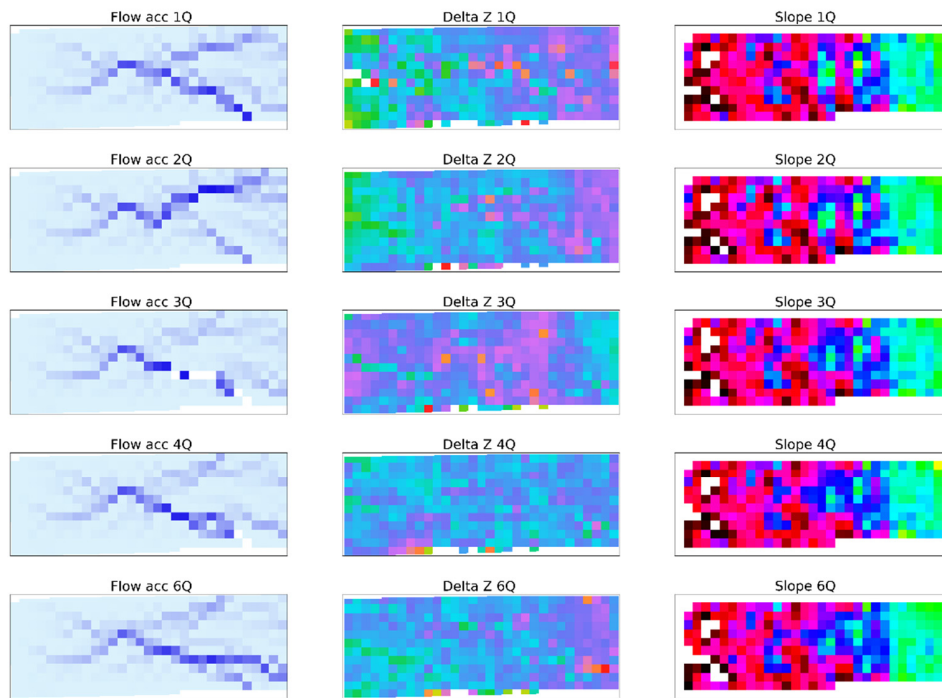

### Drainage condition, High flow, Run 1

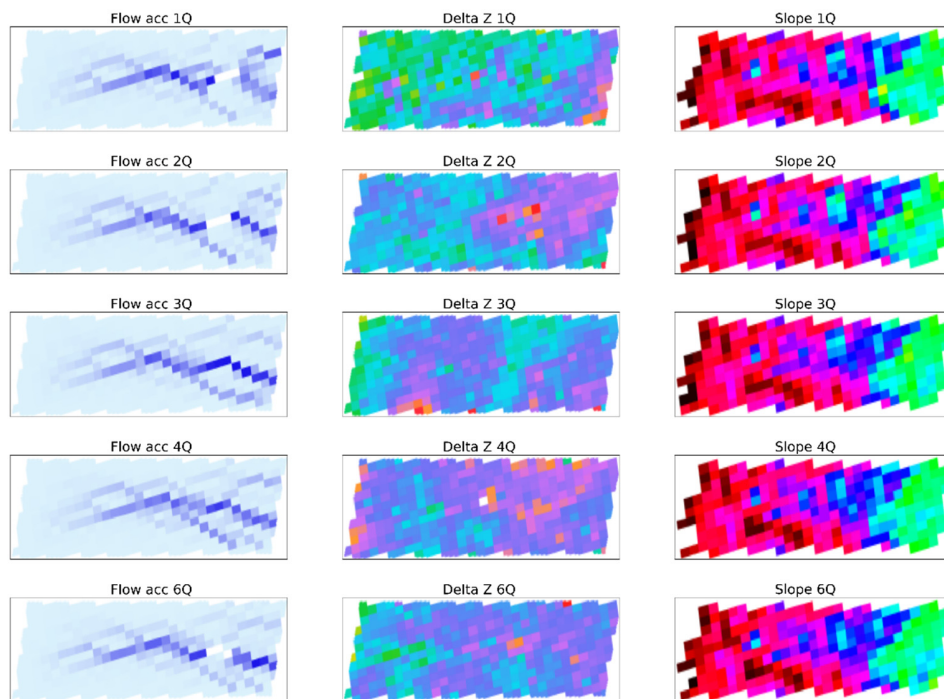

### Drainage condition, High flow, Run 2

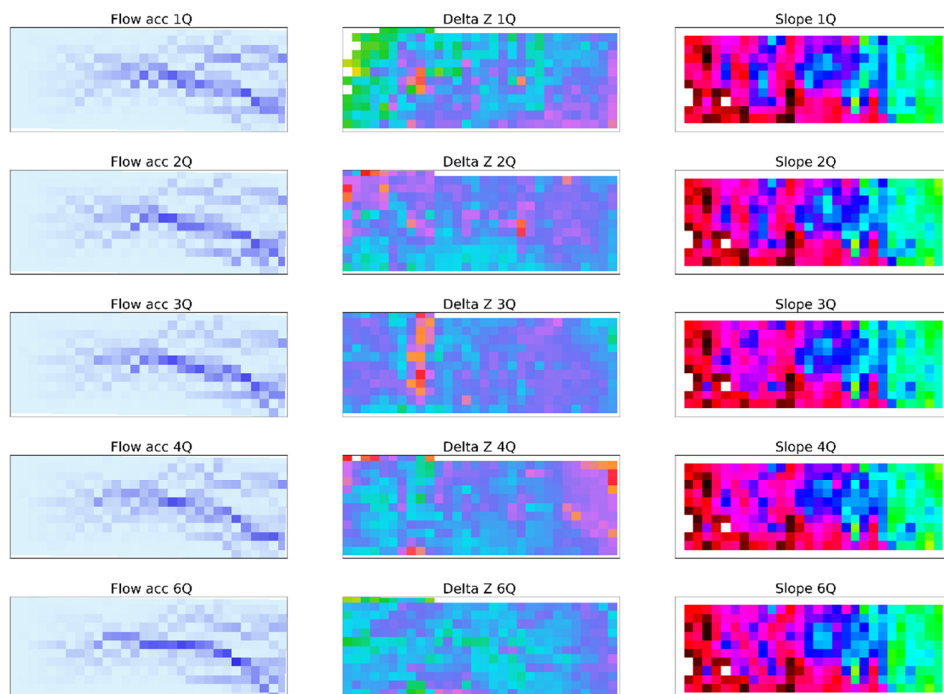

### Seepage condition, Low flow, Run 1

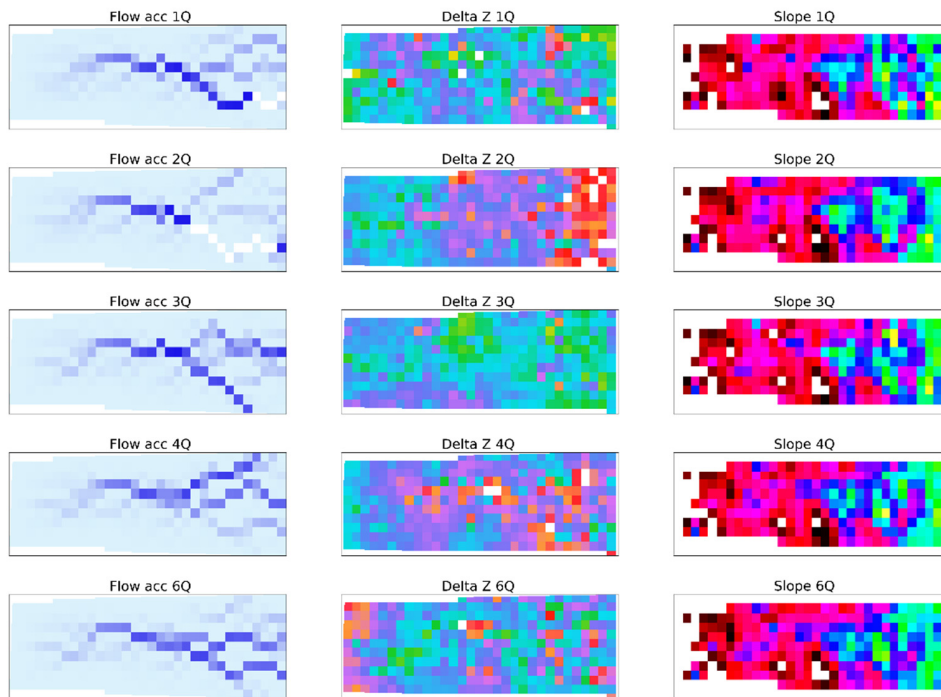

### Seepage condition, Low flow, Run 2

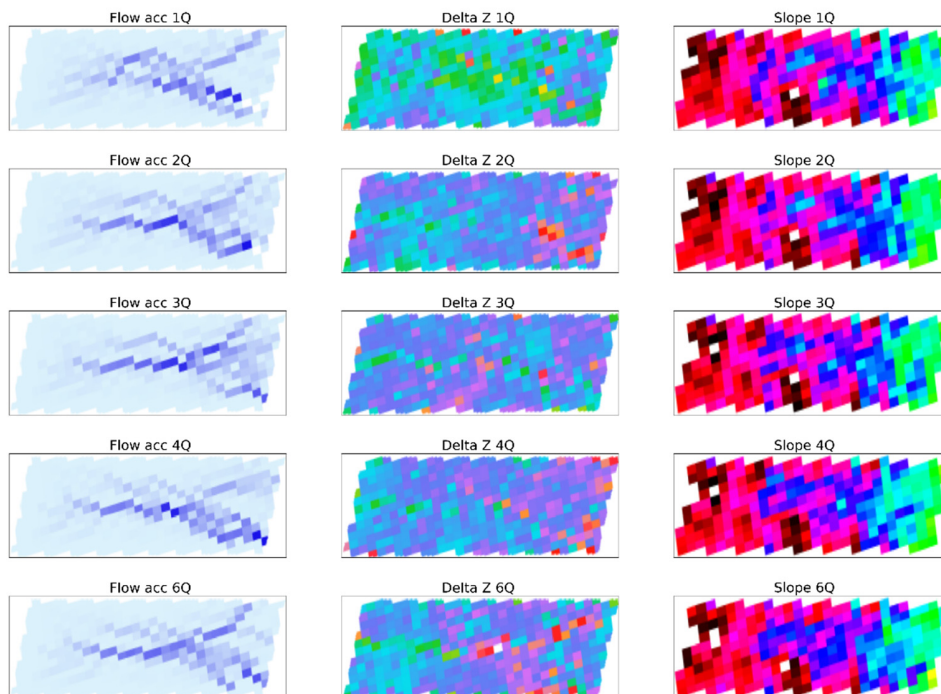

Seepage condition, High flow, Run 1

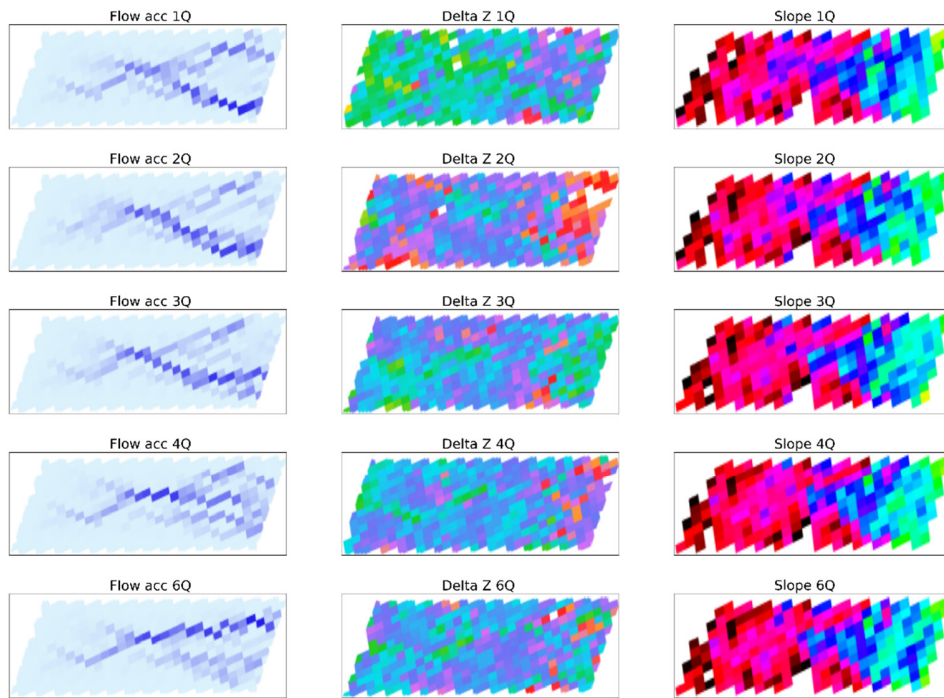

Seepage condition, High flow, Run 2

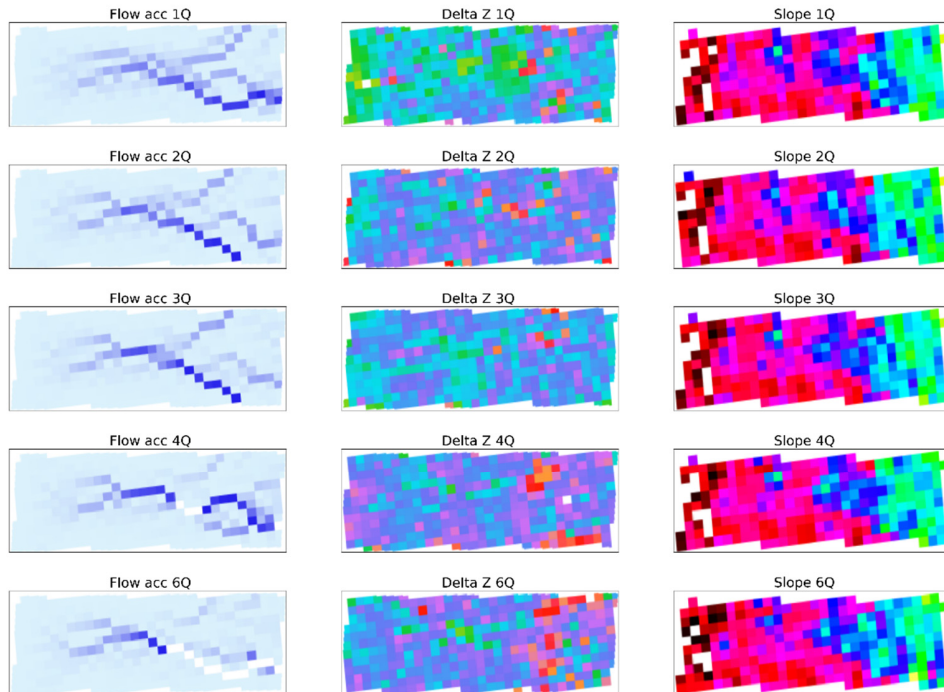

Flow direction is left to right on all maps

## Legend

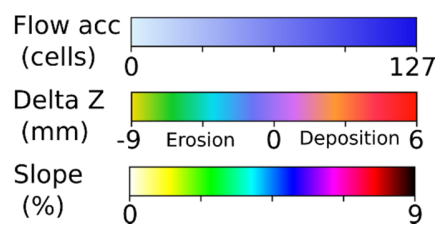

Supplement: s1 [file s1]
